# Supplementary material for: Human neutrophils functionality under effect of an Asp49 phospholipase A2 isolated from Bothrops atrox venom
Source: PubMed Central journal article supplement — Toxicon X. 2020 Mar 18;6:100032. doi: 10.1016/j.toxcx.2020.100032 (PMC7286099; doi:10.1016/j.toxcx.2020.100032), 2020-03-18
Supplement: mmc2.pdf [file mmc2.pdf]

# Supplementary Figure 2

A

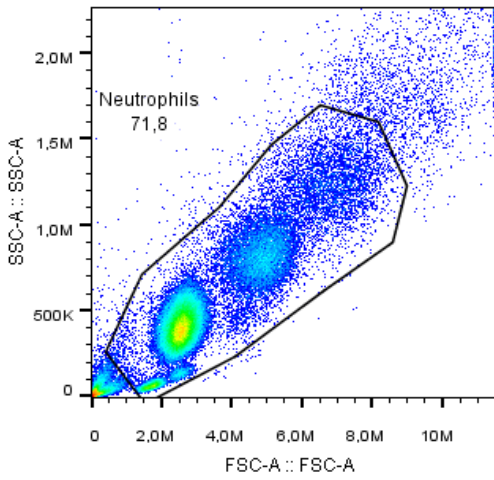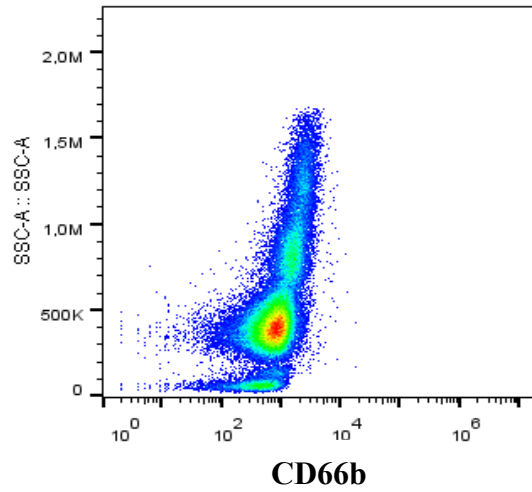

B

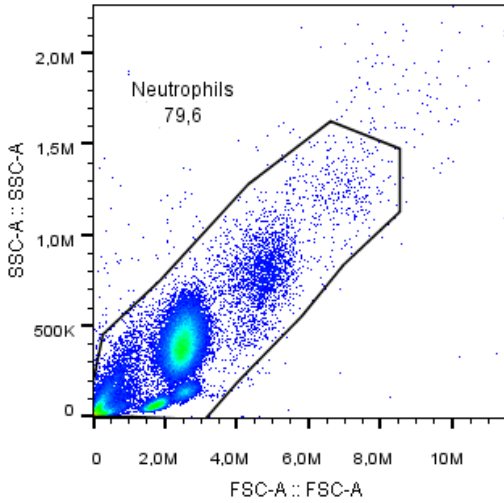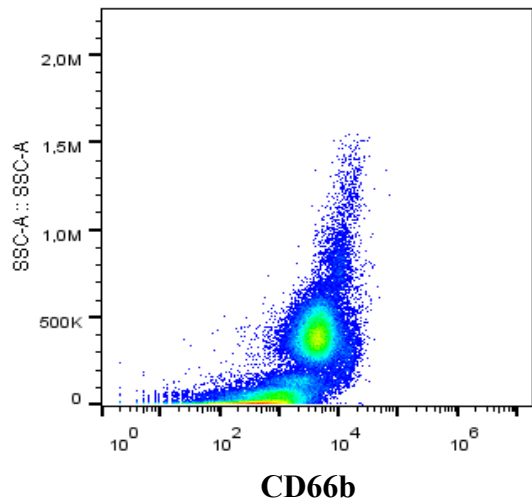

C

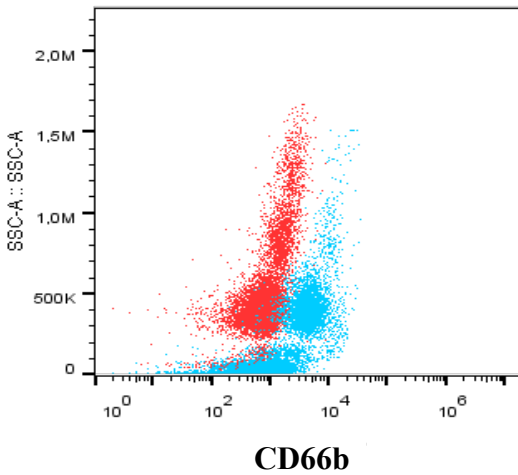

| Sample Name | Subset Name | Count |
|-------------|-------------|-------|
| CD66b       | Neutrophils | 79603 |
| Control     | Neutrophils | 71798 |

## Supplementary figure 2

**Figure 2A** Neutrophils were obtained from self-reportedly healthy donors and isolated with Histopaque 1077.  $1 \times 10^6$  neutrophils/well were acquired, 100 hundred events were gated in the dot plot. **Figure 2B** Isolated neutrophils were incubated with anti-human CD66b-FITC for 30 min, 100 hundred events were acquired and analyzed. **Figure 2C** Comparative dot plot showing the isolated neutrophils population in the negative area (red; control; without CD66b-FITC) and the neutrophils population marked (blue; with CD66b-FITC) in the positive area performed in Accuri C6 HTS (Becton Dickinson, EUA) cytometer and analyzed in FlowJo vX.0.7 software (Becton Dickinson, EUA).
